# Supplementary material for: MicroRNA-1305 Inhibits the Stemness of LCSCs and Tumorigenesis by Repressing the UBE2T-Dependent Akt-Signaling Pathway
Source: PubMed Central journal article supplement (PMC6535505; doi:10.1016/j.omtn.2019.04.013), 2019-04-22
Supplement: mmc1.pdf [file mmc1.pdf]

OMTN, Volume 16

## **Supplemental Information**

### **MicroRNA-1305 Inhibits the Stemness of LCSCs and Tumorigenesis by Repressing the UBE2T-Dependent Akt-Signaling Pathway**

**Xiaoyong Wei, Xiaolong You, Jianlong Zhang, and Cuncai Zhou**

**UBE2T Gene Descriptions:**

**NCBI GeneID: 29089**

**GenBank Accession: NM\_014176**

**NCBI Protein Accession: NP\_054895**

>NM\_014176.4 Homo sapiens ubiquitin conjugating enzyme E2 T (UBE2T), transcript variant 1, mRNA

GTTGGTCCGCGCGTTGCTGCGTTGTGAGGGGTGTCAGCTCAGTGCATCCCAGGCAGCTC  
TTAGTGTGGAGCAGTGAAGTGTGTGGTTCCTTCTACTTGGGGATCATGCAGAGAGCT  
TCACGTCTGAAGAGAGAGCTGCACATGTTAGCCACAGAGCCACCCCCAGGCATCACAT  
GTTGGCAAGATAAAGACCAAATGGATGACCTGCGAGCTCAAATATTAGGTGGAGCCAA  
CACACCTTATGAGAAAGGTGTTTTTAAGCTAGAAGTTATCATTCTGAGAGGTACCCAT  
TTGAACCTCCTCAGATCCGATTTCTCACTCCAATTTATCATCCAAACATTGATTCTGCTG  
GAAGGATTTGTCTGGATGTTCTCAAATTGCCACCAAAGGTGCTTGGAGACCATCCCTC  
AACATCGCAACTGTGTTGACCTCTATTCAGCTGCTCATGTCAGAACCAACCCTGATGA  
CCCGCTCATGGCTGACATATCCTCAGAATTTAAATATAATAAGCCAGCCTTCCTCAAGA  
ATGCCAGACAGTGGACAGAGAAGCATGCAAGACAGAAACAAAAGGCTGATGAGGAAG  
AGATGCTTGATAATCTACCAGAGGCTGGTGACTCCAGAGTACACAACACTCAACACAGAA  
AAGGAAGGCCAGTCAGCTAGTAGGCATAGAAAAGAAATTTTCATCCTGATGTTTAGGGG  
ACTTGTCCTGGTTCATCTTAGTTAATGTGTTCTTTGCCAAGGTGATCTAAGTTGCCTACC  
TTGAATTTTTTTTTAAATATATTTGATGACATAATTTTTGTGTAGTTTATTTATCTTGTAC  
ATATGTATTTTGAATCTTTTAAACCTGAAAAATAAATAGTCATTTAATGTTGA

>NP\_054895.1 ubiquitin-conjugating enzyme E2 T isoform 1 [Homo sapiens]

MQRASRLKRELHMLATEPPPGITCWQDKDQMDDLRAQILGGANTPYEKGVFKLEVIIPER  
YPFEPPIRFLTPIYHPNIDSAGRICLDVCLKLPPKGAWRPSLNIA TVLTSIQLLMSEPNPDDPL  
MADISSEFKYNKPAFLKNARQWTEKHARQKQKADEEEMLDNLPEAGDSRVHNSTQKRKA  
SQLVGIEKKFHPDV
